# Supplementary material for: Sex-specific transcriptomic and epitranscriptomic signatures of PTSD-like fear acquisition
Source: PubMed Central journal article supplement (PMC9418440; doi:10.1016/j.isci.2022.104861), 2022-08-02
Supplement: mmc1.pdf [file mmc1.pdf]

iScience, Volume 25

## **Supplemental information**

### **Sex-specific transcriptomic and epitranscriptomic signatures of PTSD-like fear acquisition**

**Andre L.M. Reis, Jillian M. Hammond, Igor Stevanovski, Jonathon C. Arnold, Iain S. McGregor, Ira W. Deveson, and Anand Gururajan**

iScience, Volume ■ ■

## **Supplemental information**

### **Sex-specific transcriptomic and epitranscriptomic signatures of PTSD-like fear acquisition**

**Andre L.M. Reis, Jillian M. Hammond, Igor Stevanovski, Jonathon C. Arnold, Iain S. McGregor, Ira W. Deveson, and Anand Gururajan**

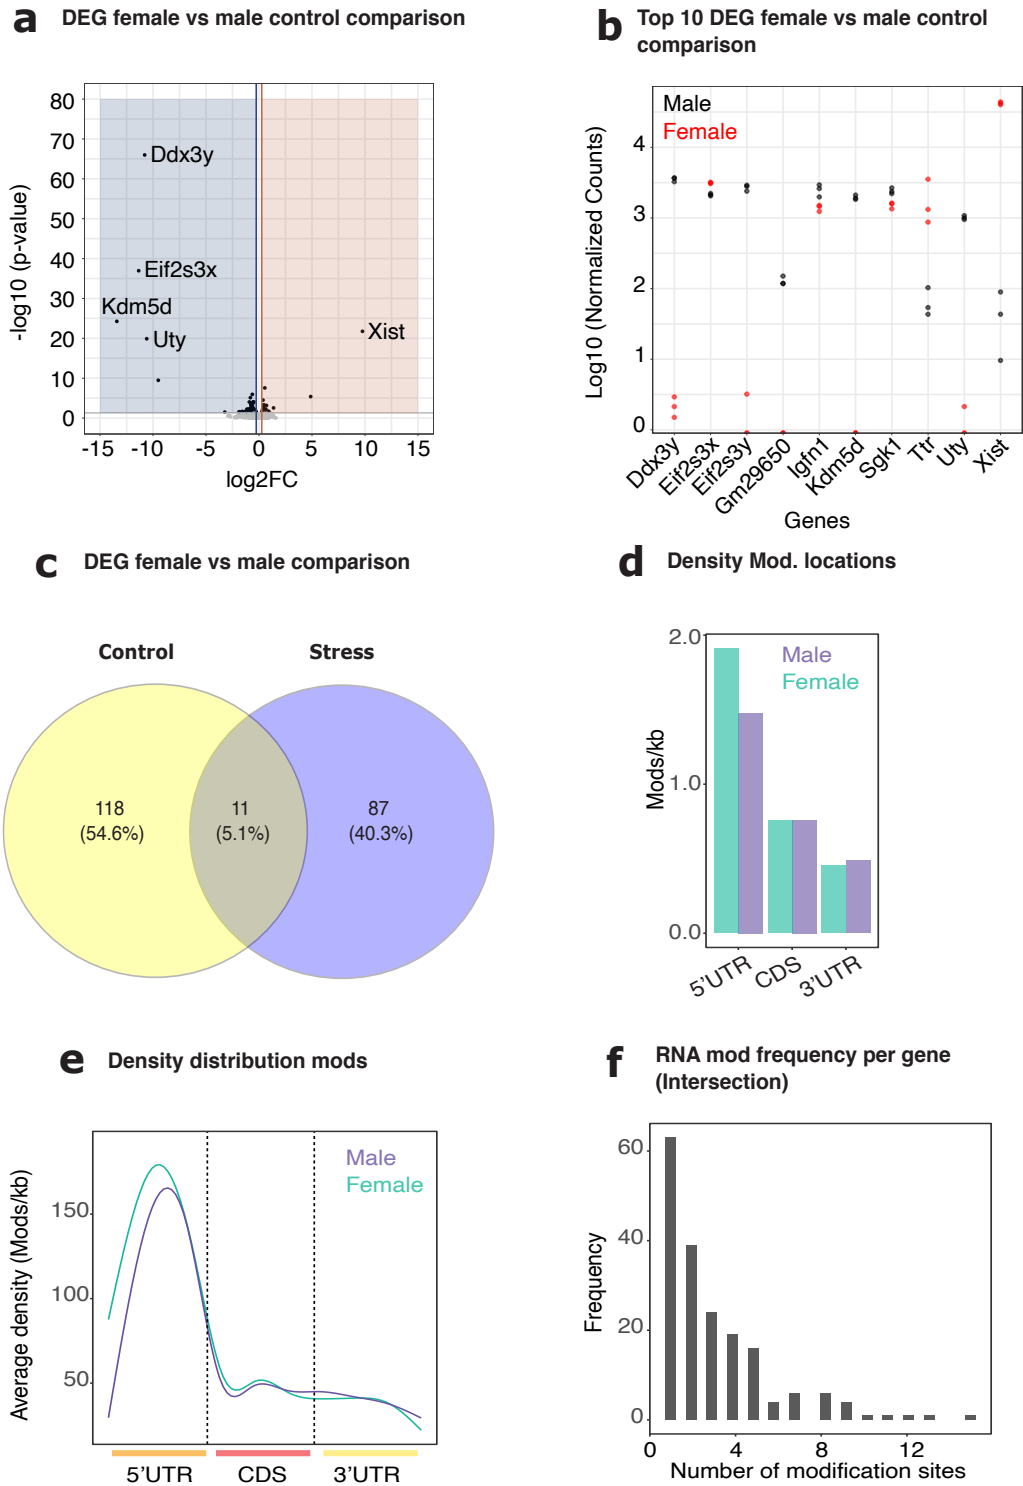

**Figure S1. Male versus female comparison and RNA modification features, Related to Figures 1 and 2** – (a) Volcano plot showing differential gene expression comparison between male and female control samples; (b) Normalized counts of top 10 differentially expressed genes between male and female control samples; (c) Intersection between male and female differentially expressed genes in control and stress conditions; (d) Density of modification distribution; (e) Relative location of RNA modifications within transcripts; (f) Number of modifications per gene, for genes with modifications in both male and female mice.

**Table S1. Sample information and RIN Analysis, Related to Figure 1.**

|        | #  | Group   | ID  | Conc (ng/ul) | 260/280 | 260/230 | Factor | Yield (ug) | Pool | Pool total | RINe |
|--------|----|---------|-----|--------------|---------|---------|--------|------------|------|------------|------|
| Male   | 1  | Control | C1  | 69.1         | 2.08    | 2.08    | 40     | 5.53       | CM1  |            |      |
| Male   | 2  | Control | C2  | 87.8         | 2.02    | 1.70    | 40     | 7.02       | CM1  |            |      |
| Male   | 3  | Control | C3  | 128.5        | 2.08    | 2.18    | 40     | 10.28      | CM1  |            |      |
| Male   | 4  | Control | C4  | 144.7        | 2.07    | 1.50    | 40     | 11.58      | CM2  |            |      |
| Male   | 5  | Control | C5  | 116.3        | 2.07    | 2.10    | 40     | 9.30       | CM2  |            |      |
| Male   | 6  | Control | C6  | 71.4         | 2.01    | 1.71    | 40     | 5.71       | CM1  | 28.54      | 7.00 |
| Male   | 7  | Control | C7  | 100.2        | 2.06    | 1.67    | 40     | 8.02       | CM2  | 28.90      | 7.20 |
| Male   | 8  | Control | C8  | 113.7        | 2.06    | 1.79    | 40     | 9.10       | CM3  |            |      |
| Male   | 9  | Control | C10 | 155.1        | 2.08    | 1.90    | 40     | 12.41      | CM3  |            |      |
| Male   | 10 | Control | C12 | 91.1         | 2.07    | 0.51    | 40     | 7.29       | CM3  | 28.79      | 7.30 |
| Male   | 11 | Shock   | S1  | 89.7         | 2.04    | 0.80    | 40     | 7.18       | SM1  | 22.13      | 7.80 |
| Male   | 12 | Shock   | S2  | 47.3         | 2.03    | 1.96    | 40     | 3.78       | SM1  |            |      |
| Male   | 13 | Shock   | S3  | 57.9         | 2.03    | 1.58    | 40     | 4.63       | SM1  |            |      |
| Male   | 14 | Shock   | S4  | 81.7         | 2.03    | 1.86    | 40     | 6.54       | SM1  |            |      |
| Male   | 15 | Shock   | S5  | 59.8         | 2.03    | 2.02    | 40     | 4.78       | SM2  | 21.72      | 7.60 |
| Male   | 16 | Shock   | S6  | 93.7         | 1.93    | 1.14    | 40     | 7.50       | SM2  |            |      |
| Male   | 17 | Shock   | S7  | 29.3         | 1.97    | 1.63    | 40     | 2.34       | SM2  |            |      |
| Male   | 18 | Shock   | S8  | 88.7         | 1.72    | 0.91    | 40     | 7.10       | SM2  |            |      |
| Male   | 19 | Shock   | S9  | 76.9         | 2.02    | 1.68    | 40     | 6.15       | SM3  | 20.82      | 7.80 |
| Male   | 20 | Shock   | S10 | 106.0        | 2.03    | 2.04    | 40     | 8.48       | SM3  |            |      |
| Male   | 21 | Shock   | S11 | 51.0         | 2.03    | 0.79    | 40     | 4.08       | SM3  |            |      |
| Male   | 22 | Shock   | S12 | 26.3         | 2.03    | 1.57    | 40     | 2.10       | SM3  |            |      |
| Female | 1  | Control | C1  | 67.5         | 2.05    | 1.22    | 40     | 5.40       | CF1  | 19.28      | 6.90 |
| Female | 2  | Control | C2  | 48.3         | 1.88    | 1.21    | 40     | 3.86       | CF1  |            |      |
| Female | 3  | Control | C3  | 57.7         | 2.05    | 0.57    | 40     | 4.62       | CF1  |            |      |
| Female | 4  | Control | C4  | 67.5         | 2.05    | 0.71    | 40     | 5.40       | CF1  |            |      |
| Female | 5  | Control | C5  | 76.2         | 2.04    | 0.47    | 40     | 6.10       | CF2  | 20.28      | 7.60 |
| Female | 6  | Control | C6  | 44.4         | 2.05    | 1.50    | 40     | 3.55       | CF2  |            |      |
| Female | 7  | Control | C7  | 50.8         | 2.04    | 2.09    | 40     | 4.06       | CF2  |            |      |
| Female | 8  | Control | C8  | 51.3         | 2.04    | 1.94    | 40     | 4.10       | CF3  | 21.89      | 7.60 |
| Female | 9  | Control | C9  | 82.1         | 2.04    | 1.85    | 40     | 6.57       | CF2  |            |      |
| Female | 10 | Control | C10 | 68.1         | 2.02    | 1.45    | 40     | 5.45       | CF3  |            |      |
| Female | 11 | Control | C11 | 105.5        | 2.04    | 1.95    | 40     | 8.44       | CF3  |            |      |
| Female | 12 | Control | C12 | 48.7         | 2.04    | 2.02    | 40     | 3.90       | CF3  |            |      |
| Female | 13 | Shock   | S1  | 46.9         | 1.97    | 1.99    | 40     | 3.75       | SF1  | 21.26      | 7.70 |
| Female | 14 | Shock   | S2  | 25.8         | 1.96    | 1.48    | 40     | 2.06       | SF1  |            |      |
| Female | 15 | Shock   | S3  | 30.1         | 1.98    | 1.34    | 40     | 2.41       | SF2  | 21.10      | 7.40 |
| Female | 16 | Shock   | S4  | 40.1         | 1.97    | 1.48    | 40     | 3.21       | SF2  |            |      |
| Female | 17 | Shock   | S5  | 74.7         | 1.97    | 1.68    | 40     | 5.98       | SF3  | 23.01      | 7.60 |
| Female | 18 | Shock   | S6  | 67.6         | 1.92    | 0.88    | 40     | 5.41       | SF2  |            |      |
| Female | 19 | Shock   | S7  | 81.5         | 2.01    | 2.00    | 40     | 6.52       | SF3  |            |      |
| Female | 20 | Shock   | S8  | 64.8         | 2.00    | 0.58    | 40     | 5.18       | SF3  |            |      |
| Female | 21 | Shock   | S9  | 126.0        | 2.03    | 2.07    | 40     | 10.08      | SF2  |            |      |
| Female | 22 | Shock   | S10 | 100.7        | 1.80    | 1.07    | 40     | 8.06       | SF1  |            |      |
| Female | 23 | Shock   | S11 | 66.6         | 2.01    | 1.80    | 40     | 5.33       | SF3  |            |      |
| Female | 24 | Shock   | S12 | 92.4         | 2.03    | 2.13    | 40     | 7.39       | SF1  |            |      |

**Table S2. Illumina sequencing metadata, Related to Figure 1.**

| Gender | Group   | ID | Read pairs | Alignment (%) | Reads assigned | Reads unassigned (amiguity) | Reads unassigned (multimapping) | Reads unassigned (no feat.) | Reads unassigned (unmapped) |
|--------|---------|----|------------|---------------|----------------|-----------------------------|---------------------------------|-----------------------------|-----------------------------|
| Male   | Control | C1 | 41487699   | 85.23         | 55949127       | 2289614                     | 11300450                        | 11229093                    | 8692278                     |
| Male   | Control | C2 | 39393294   | 83.9          | 50565002       | 2057963                     | 10710257                        | 12458723                    | 9252499                     |
| Male   | Control | C3 | 37502359   | 84.61         | 49398166       | 2032017                     | 10339008                        | 10881070                    | 8267739                     |
| Male   | Stress  | S1 | 45332871   | 84.65         | 60273069       | 2448821                     | 11706633                        | 12910950                    | 10078806                    |
| Male   | Stress  | S2 | 34861558   | 84.87         | 34781588       | 1400166                     | 5983099                         | 8170388                     | 5713196                     |
| Male   | Stress  | S3 | 26325794   | 84.78         | 45521175       | 1830299                     | 8861354                         | 11056583                    | 7603869                     |
| Female | Control | C1 | 48915566   | 85.09         | 33139753       | 1332423                     | 6127105                         | 7300141                     | 4959895                     |
| Female | Control | C2 | 35016314   | 84.31         | 45066193       | 1828363                     | 9001603                         | 11505386                    | 7935474                     |
| Female | Control | C3 | 24663292   | 85.77         | 65078425       | 2664988                     | 13685579                        | 13970645                    | 10401297                    |
| Female | Stress  | S1 | 45325334   | 83.98         | 51215833       | 2088257                     | 10379916                        | 11878146                    | 8932234                     |
| Female | Stress  | S2 | 37656809   | 85.22         | 49906147       | 2038034                     | 9862821                         | 11206717                    | 8050096                     |
| Female | Stress  | S3 | 39195830   | 84.22         | 58938048       | 2404931                     | 12995183                        | 13721877                    | 10294202                    |

**Table S7. ONT sequencing metadata, Related to Figure 1.**

| Group   | Gender | ID | Passed reads | Passed yield  | Average read length | Maximum read length |
|---------|--------|----|--------------|---------------|---------------------|---------------------|
| control | female | C1 | 3,513,548    | 5,231,763,871 | 1,489               | 18,219              |
| control | female | C2 | 4,395,482    | 6,539,080,227 | 1,487.70            | 28,726              |
| control | female | C3 | 4,619,328    | 5,197,619,941 | 1,125.20            | 15,692              |
| control | male   | C1 | 4,360,179    | 6,557,971,239 | 1,504.10            | 19,488              |
| control | male   | C2 | 4,287,537    | 5,864,457,464 | 1,367.80            | 18,344              |
| control | male   | C3 | 3,206,257    | 4,667,269,577 | 1,455.70            | 19,834              |
| stress  | female | S1 | 3,748,572    | 5,782,887,483 | 1,542.70            | 26,121              |
| stress  | female | S2 | 3,470,134    | 5,120,664,648 | 1,475.60            | 18,295              |
| stress  | female | S3 | 4,116,830    | 5,945,668,648 | 1,444.20            | 21,065              |
| stress  | male   | S1 | 3,569,172    | 5,672,176,624 | 1,589.20            | 22,783              |
| stress  | male   | S2 | 4,549,131    | 6,751,211,796 | 1,484.10            | 22,839              |
| stress  | male   | S3 | 2,241,571    | 3,051,599,156 | 1,361.40            | 18,758              |

**Table S13. Enrichment analysis of common differentially modified transcripts in male and female mice, Related to Figure 2.**

| Term                                                       | Overlap | P.value  | Adjusted P.value | Old P.value | Old Adjusted P.value | Odds.Ratio  | Combined.Score | Genes                                                                                       |
|------------------------------------------------------------|---------|----------|------------------|-------------|----------------------|-------------|----------------|---------------------------------------------------------------------------------------------|
| chemical synaptic transmission (GO:0007268)                | 0.0458  | 1.12E-06 | 0.001755834      | 0           | 0                    | 5.441780822 | 74.58260604    | GRIA2;SNAP25;NAPB;GABBR2;SLC12A5;STXBP1;SLC1A2;NSG1;SLC6A1;CPLX1;PRKAR1B;DNAJC5;PRKACB;SNCA |
| cotranslational protein targeting to membrane (GO:0006613) | 0.0851  | 2.71E-06 | 0.002118703      | 0           | 0                    | 10.30990332 | 132.1646793    | RPL7A;RPL32;RPLP0;RPS6;SRP14;SEC62;RPL6;RPL7                                                |

|                                                                          |        |          |             |   |   |             |             |                                               |
|--------------------------------------------------------------------------|--------|----------|-------------|---|---|-------------|-------------|-----------------------------------------------|
| neurotransmitter transport (GO:0006836)                                  | 0.0959 | 5.22E-06 | 0.002118703 | 0 | 0 | 11.70103267 | 142.3271737 | SNAP25;DNAJC5;STXBP1;SLC1A2;ATP1A2;GLUL;CPLX1 |
| protein targeting to ER (GO:0045047)                                     | 0.0777 | 5.39E-06 | 0.002118703 | 0 | 0 | 9.3289178   | 113.1728031 | RPL7A;RPL32;RPS6;RPLP0;SRP14;SEC62;RPL6;RPL7  |
| SRP-dependent cotranslational protein targeting to membrane (GO:0006614) | 0.0778 | 2.09E-05 | 0.006589679 | 0 | 0 | 9.296425927 | 100.1555344 | RPL7A;RPL32;RPLP0;RPS6;SRP14;RPL6;RPL7        |
| signal release from synapse (GO:0099643)                                 | 0.1163 | 4.76E-05 | 0.008391074 | 0 | 0 | 14.37627217 | 143.0705157 | SNAP25;STXBP1;DNAJC5;CPLX1;SNCA               |
| negative regulation of proteolysis (GO:0045861)                          | 0.1163 | 4.76E-05 | 0.008391074 | 0 | 0 | 14.37627217 | 143.0705157 | CST3;PRNP;TME159;SERPINE2;CAMK2N1             |
| aerobic electron transport chain (GO:0019646)                            | 0.0857 | 4.78E-05 | 0.008391074 | 0 | 0 | 10.28645833 | 102.3444907 | NDUFB6;NDUFA4;NDUFS3;NDUFC1;SDHC;COX5B        |
| mitochondrial ATP synthesis coupled electron transport (GO:0042775)      | 0.0845 | 5.18E-05 | 0.008391074 | 0 | 0 | 10.12769231 | 99.9484642  | NDUFB6;NDUFA4;NDUFS3;NDUFC1;SDHC;COX5B        |
| neurotransmitter secretion (GO:0007269)                                  | 0.1136 | 5.33E-05 | 0.008391074 | 0 | 0 | 14.00694149 | 137.8106767 | SNAP25;STXBP1;DNAJC5;CPLX1;SNCA               |
| positive regulation of ATP biosynthetic process                          | 0.3333 | 6.38E-05 | 0.008720588 | 0 | 0 | 54.12021858 | 522.7895301 | PINK1;VCP;ENO1                                |

|                                                             |        |          |             |   |   |             |             |                                              |
|-------------------------------------------------------------|--------|----------|-------------|---|---|-------------|-------------|----------------------------------------------|
| (GO:2001171)                                                |        |          |             |   |   |             |             |                                              |
| potassium ion homeostasis (GO:0055075)                      | 0.1667 | 6.65E-05 | 0.008720588 | 0 | 0 | 21.75164835 | 209.2052201 | SLC12A5;ATP1A2;ATP1A1;ATP1B1                 |
| inorganic cation import across plasma membrane (GO:0098659) | 0.0779 | 8.18E-05 | 0.009901875 | 0 | 0 | 9.269014085 | 87.22903874 | SLC12A5;SLC39A10;ATP1A2;ATP1A1;SLC6A1;ATP1B1 |
